# Supplementary material for: Plasma HULC as a Promising Novel Biomarker for the Detection of Hepatocellular Carcinoma
Source: Hindawi journal article supplement (doi:10.1155/2013/136106), 2013-01-01
Supplement: f1 [file 136106.f1.pdf]

Supplemental Table 1. The Characteristics of healthy individuals

| Case No. | Gender | Age | HBsAg | HBV<br>DNA | Collection |
|----------|--------|-----|-------|------------|------------|
| 1        | F      | 43  | (-)   | (-)        | Biopsy     |
| 2        | M      | 55  | (-)   | (-)        | Biopsy     |
| 3        | F      | 64  | (-)   | (-)        | Biopsy     |
| 4        | F      | 55  | (-)   | (-)        | Biopsy     |
| 5        | M      | 63  | (-)   | (-)        | Biopsy     |
| 6        | M      | 48  | (-)   | (-)        | Biopsy     |
| 7        | M      | 55  | (-)   | (-)        | Biopsy     |
| 8        | M      | 71  | (-)   | (-)        | Biopsy     |
| 9        | M      | 61  | (-)   | (-)        | Biopsy     |
| 10       | F      | 53  | (-)   | (-)        | Biopsy     |
| 11       | F      | 36  | (-)   | (-)        | Biopsy     |
| 12       | M      | 51  | (-)   | (-)        | Biopsy     |
| 13       | M      | 46  | (-)   | (-)        | Biopsy     |
| 14       | M      | 55  | (-)   | (-)        | Biopsy     |
| 15       | M      | 62  | (-)   | (-)        | Biopsy     |
| 16       | F      | 57  | (-)   | (-)        | Biopsy     |
| 17       | M      | 54  | (-)   | (-)        | Biopsy     |
| 18       | M      | 62  | (-)   | (-)        | Biopsy     |
| 19       | M      | 57  | (-)   | (-)        | Biopsy     |
| 20       | M      | 63  | (-)   | (-)        | Biopsy     |

Supplemental Table 2. The Characteristics of HCC patients

| Case No. | Gender | Age | HBsAg | HBV DNA | Edmondson Grade | Collection |
|----------|--------|-----|-------|---------|-----------------|------------|
| 21       | M      | 38  | (-)   | (-)     | I-II            | Resection  |
| 22       | M      | 59  | (-)   | (-)     | I-II            | Resection  |
| 23       | F      | 54  | (-)   | (-)     | I-II            | Resection  |
| 24       | M      | 42  | (-)   | (-)     | I-II            | Resection  |
| 25       | M      | 46  | (-)   | (-)     | I-II            | Resection  |
| 26       | M      | 61  | (-)   | (-)     | I-II            | Resection  |
| 27       | M      | 59  | (+)   | (+)     | I-II            | Resection  |
| 28       | M      | 57  | (-)   | (-)     | II-III          | Resection  |
| 29       | M      | 51  | (-)   | (-)     | II-III          | Resection  |
| 30       | M      | 56  | (-)   | (-)     | II-III          | Resection  |
| 31       | M      | 39  | (-)   | (-)     | II-III          | Resection  |
| 32       | M      | 53  | (-)   | (-)     | II-III          | Resection  |
| 33       | M      | 49  | (+)   | (+)     | II-III          | Resection  |
| 34       | M      | 52  | (+)   | (+)     | II-III          | Resection  |
| 35       | M      | 62  | (+)   | (+)     | II-III          | Resection  |
| 36       | F      | 61  | (+)   | (+)     | II-III          | Resection  |
| 37       | M      | 62  | (+)   | (+)     | II-III          | Resection  |
| 38       | M      | 61  | (+)   | (+)     | II-III          | Resection  |
| 39       | M      | 47  | (+)   | (+)     | II-III          | Resection  |
| 40       | M      | 60  | (+)   | (+)     | II-III          | Resection  |
| 41       | F      | 64  | (+)   | (+)     | III-IV          | Resection  |
| 41       | M      | 67  | (+)   | (+)     | III-IV          | Resection  |
| 42       | M      | 74  | (+)   | (+)     | III-IV          | Resection  |
| 43       | M      | 68  | (+)   | (+)     | III-IV          | Resection  |
| 44       | M      | 70  | (+)   | (+)     | III-IV          | Resection  |
| 45       | F      | 36  | (+)   | (+)     | III-IV          | Resection  |
| 46       | M      | 42  | (+)   | (+)     | III-IV          | Resection  |
| 47       | F      | 58  | (+)   | (+)     | III-IV          | Resection  |
| 48       | M      | 64  | (+)   | (+)     | III-IV          | Resection  |
| 49       | M      | 54  | (+)   | (+)     | III-IV          | Resection  |
| 50       | F      | 62  | (-)   | (-)     | III-IV          | Resection  |
